# Supplementary material for: A fusion of CD63–BCAR4 identified in lung adenocarcinoma promotes tumorigenicity and metastasis
Source: PubMed Central journal article supplement (PMC7782829; doi:10.1038/s41416-020-01146-3), 2020-11-18
Supplement: 41416_2020_1146_MOESM2_ESM.pdf [file 41416_2020_1146_MOESM2_ESM.pdf]

**Table S1.** Information of NCCLUAD patients

| Sample ID   | Histology           | Tumor grade* | Gender | Age | Smoking | Pack-year | EGFR Mutation | KRAS Mutation | RNA-seq      |
|-------------|---------------------|--------------|--------|-----|---------|-----------|---------------|---------------|--------------|
| NCCLUAD-002 | Lung adenocarcinoma | PD           | M      | 62  | Ever    | 63        | Not detected  | Not detected  |              |
| NCCLUAD-003 | Lung adenocarcinoma | PD           | M      | 59  | Ever    | 45        | Not detected  | Not detected  |              |
| NCCLUAD-004 | Lung adenocarcinoma | PD           | F      | 53  | Never   |           | Not detected  | Not detected  |              |
| NCCLUAD-005 | Lung adenocarcinoma | MD           | F      | 60  | Never   |           | Not detected  | Not detected  |              |
| NCCLUAD-006 | Lung adenocarcinoma | PD           | F      | 52  | Never   |           | Not detected  | Not detected  |              |
| NCCLUAD-007 | Lung adenocarcinoma | PD           | F      | 44  | Never   |           | Not detected  | Not detected  | KIF5-RET     |
| NCCLUAD-008 | Lung adenocarcinoma | -            | M      | 59  | Ever    | 80        | Not detected  | Not detected  |              |
| NCCLUAD-009 | Lung adenocarcinoma | PD           | M      | 54  | Ever    | 6         | Not detected  | Not detected  | KIF5-RET     |
| NCCLUAD-010 | Lung adenocarcinoma | MD           | F      | 53  | Never   |           | Not detected  | Not detected  | CD63-BCAR4   |
| NCCLUAD-011 | Lung adenocarcinoma | PD           | M      | 51  | Ever    | 1         | Not detected  | Not detected  |              |
| NCCLUAD-012 | Lung adenocarcinoma | PD           | F      | 77  | Never   |           | Not detected  | Not detected  |              |
| NCCLUAD-014 | Lung adenocarcinoma | -            | M      | 40  | Ever    | 4         | Not detected  | Not detected  | EML4-ALK     |
| NCCLUAD-018 | Lung adenocarcinoma | PD           | F      | 63  | Never   |           | Not detected  | Not detected  | EML4-ALK     |
| NCCLUAD-019 | Lung adenocarcinoma | MD           | M      | 34  | Never   |           | Not detected  | Not detected  |              |
| NCCLUAD-020 | Lung adenocarcinoma | MD           | M      | 69  | Never   |           | Not detected  | Not detected  | EML4-ALK     |
| NCCLUAD-023 | Lung adenocarcinoma | MD           | F      | 54  | Ever    | 10        | Not detected  | Not detected  |              |
| NCCLUAD-024 | Lung adenocarcinoma | PD           | M      | 43  | Never   |           | Not detected  | Not detected  |              |
| NCCLUAD-030 | Lung adenocarcinoma | PD           | M      | 37  | Ever    | 18        | Not detected  | Not detected  |              |
| NCCLUAD-031 | Lung adenocarcinoma | PD           | M      | 51  | Ever    | 6.7       | Not detected  | Not detected  |              |
| NCCLUAD-032 | Lung adenocarcinoma | PD           | M      | 52  | Ever    | 2         | Not detected  | Not detected  |              |
| NCCLUAD-033 | Lung adenocarcinoma | PD           | M      | 49  | Ever    | 10        | Not detected  | Not detected  | EML4-ALK     |
| NCCLUAD-034 | Lung adenocarcinoma | PD           | M      | 53  | Ever    | 0.25      | Not detected  | Not detected  |              |
| NCCLUAD-038 | Lung adenocarcinoma | MD           | F      | 38  | Never   |           | Not detected  | Not detected  | ROS1-SLC43A2 |
| NCCLUAD-043 | Lung adenocarcinoma | MD           | F      | 53  | Never   |           | Not detected  | Not detected  |              |
| NCCLUAD-045 | Lung adenocarcinoma | WD           | F      | 54  | Never   |           | Not detected  | Not detected  | KIF5B-REB    |
| NCCLUAD-046 | Lung adenocarcinoma | MD           | F      | 55  | Never   |           | Not detected  | Not detected  | EML4-ALK     |
| NCCLUAD-047 | Lung adenocarcinoma | MD           | F      | 55  | Never   |           | Not detected  | Not detected  |              |
| NCCLUAD-049 | Lung adenocarcinoma | MD           | F      | 57  | Never   |           | Not detected  | Not detected  |              |
| NCCLUAD-050 | Lung adenocarcinoma | -            | F      | 47  | Never   |           | Not detected  | Not detected  |              |

\* PD, poorly differentiated; MD, moderately differentiated; WD, well differentiated

**Table S2.** Differentially expressed genes between empty vector and CD63-BCAR4 identified by microarray

| Category                                              | Gene Symbol | Fold change                 |                             |                      | Gene Name                                                                         |
|-------------------------------------------------------|-------------|-----------------------------|-----------------------------|----------------------|-----------------------------------------------------------------------------------|
|                                                       |             | CD63-BCAR4<br>Stable cell-1 | CD63-BCAR4<br>Stable cell-2 | BCAR4<br>Stable cell |                                                                                   |
| Cell migration                                        | MMP1        | 8.722                       | 7.810                       | 0.661                | matrix metalloproteinase 1                                                        |
|                                                       | LINC00473   | 7.024                       | 3.935                       | 2.282                | long intergenic non-protein coding RNA 473                                        |
| Cell differentiation                                  | DCLK1       | 5.833                       | 7.099                       | 1.643                | doublecortin-like kinase 1                                                        |
| Extracellular matrix                                  | COL13A1     | 5.693                       | 7.137                       | 1.450                | collagen, type XIII, alpha 1                                                      |
| Cell differentiation                                  | DMBT1       | 5.634                       | 7.108                       | 1.606                | deleted in malignant brain tumors 1                                               |
| Cell differentiation, Neurogenesis                    | ACOX2       | 5.002                       | 5.973                       | 0.901                | acyl-CoA oxidase 2, branched chain                                                |
|                                                       | CACNG7      | 4.616                       | 6.732                       | 0.937                | calcium channel, voltage-dependent, gamma subunit 7                               |
|                                                       | ETV4        | 4.588                       | 6.487                       | 0.793                | ets variant 4                                                                     |
| Extracellular matrix                                  | SH3TC1      | 4.516                       | 3.610                       | 0.806                | SH3 domain and tetratricopeptide repeats 1                                        |
|                                                       | TGM2        | 3.975                       | 5.945                       | 1.527                | transglutaminase 2                                                                |
| Inflammatory response                                 | FAM196B     | 3.968                       | 2.767                       | 1.370                | family with sequence similarity 196, member B                                     |
|                                                       | CHST1       | 3.832                       | 6.199                       | 0.746                | carbohydrate (keratan sulfate Gal-6) sulfotransferase 1                           |
| Cell Proliferation                                    | CyclinD1    | 3.822                       | 4.067                       | 1.028                | cyclin D1                                                                         |
| Apoptotic process, Cell differentiation, Neurogenesis | SPRY4       | 3.705                       | 4.839                       | 1.156                | sprouty homolog 4 (Drosophila)                                                    |
|                                                       | PCSK9       | 3.654                       | 3.277                       | 13.917               | proprotein convertase subtilisin/kexin type 9                                     |
| Cell differentiation, Neurogenesis                    | ETV5        | 3.514                       | 5.426                       | 1.669                | ets variant 5                                                                     |
| Angiogenesis                                          | ANGPTL4     | 3.469                       | 6.646                       | 0.467                | angiopoietin-like 4                                                               |
| Cell Proliferation                                    | SCD         | 3.421                       | 4.286                       | 5.813                | stearoyl-CoA desaturase (delta-9-desaturase)                                      |
|                                                       | DMKN        | 3.184                       | 4.106                       | 0.853                | dermokine                                                                         |
|                                                       | RORA        | 3.177                       | 3.948                       | 0.948                | RAR-related orphan receptor A                                                     |
|                                                       | GALNT14     | 3.168                       | 3.329                       | 0.639                | polypeptide N-acetylgalactosaminyltransferase 14                                  |
|                                                       | RNA5-8S5    | 3.132                       | 2.085                       | 0.816                | RNA, 5.8S ribosomal 5                                                             |
| Immune response, Secretion                            | MPP4        | 3.131                       | 2.962                       | 0.924                | membrane protein, palmitoylated 4 (MAGUK p55 subfamily member 4)                  |
|                                                       | MPP4        | 3.129                       | 3.108                       | 1.209                | membrane protein, palmitoylated 4 (MAGUK p55 subfamily member 4)                  |
|                                                       | TLR4        | 3.129                       | 3.461                       | 1.213                | toll-like receptor 4                                                              |
|                                                       | DMKN        | 3.110                       | 3.539                       | 0.767                | dermokine                                                                         |
|                                                       | MEG3        | 2.982                       | 3.224                       | 1.549                | maternally expressed 3 (non-protein coding)                                       |
| Secretion                                             | IL17RD      | 2.979                       | 4.362                       | 2.145                | interleukin 17 receptor D                                                         |
| Cell migration                                        | CA9         | 2.954                       | 8.423                       | 0.813                | carbonic anhydrase IX                                                             |
|                                                       | DOCK4       | 2.941                       | 3.805                       | 0.742                | dedicator of cytokinesis 4                                                        |
|                                                       | KCNMA1      | 2.917                       | 3.281                       | 1.259                | potassium channel, calcium activated large conductance subfamily M alpha, member  |
|                                                       | SEMA3A      | 2.915                       | 3.098                       | 1.235                | sema domain, immunoglobulin domain (Ig), short basic domain, secreted, (semaphori |
|                                                       | GOLGA6C     | 2.811                       | 2.317                       | 1.977                | golgin A6 family, member C                                                        |
|                                                       | SYNE3       | 2.795                       | 2.814                       | 1.484                | spectrin repeat containing, nuclear envelope family member 3                      |
|                                                       | TMEM233     | 2.762                       | 3.304                       | 0.598                | transmembrane protein 233                                                         |
|                                                       | SPRED3      | 2.762                       | 3.756                       | 1.153                | sprouty-related, EVH1 domain containing 3                                         |
|                                                       | WNK2        | 2.752                       | 3.502                       | 1.408                | WNK lysine deficient protein kinase 2                                             |
|                                                       | FLJ41170    | 2.735                       | 2.922                       | 1.808                | uncharacterized LOC440200                                                         |

|                                      |              |       |       |       |                                                                                          |
|--------------------------------------|--------------|-------|-------|-------|------------------------------------------------------------------------------------------|
| Cell Proliferation                   | HMGA2        | 2.709 | 2.550 | 1.069 | high mobility group AT-hook 2                                                            |
|                                      | NIM1K        | 2.700 | 6.135 | 1.219 | NIM1 serine/threonine protein kinase                                                     |
|                                      | MLPH         | 2.686 | 4.646 | 0.615 | melanophilin                                                                             |
|                                      | AGPAT9       | 2.674 | 3.216 | 1.117 | 1-acylglycerol-3-phosphate O-acyltransferase 9                                           |
|                                      | NRG2         | 2.655 | 4.122 | 0.855 | neuregulin 2                                                                             |
| Cell differentiation, Neurogenesis   | CDH4         | 2.641 | 2.864 | 0.982 | cadherin 4, type 1, R-cadherin (retinal)                                                 |
|                                      | TUBBP5       | 2.639 | 4.991 | 1.024 | tubulin, beta pseudogene 5                                                               |
|                                      | STXBP5L      | 2.598 | 2.679 | 2.051 | syntaxin binding protein 5-like                                                          |
|                                      | LRP3         | 2.537 | 3.018 | 1.453 | low density lipoprotein receptor-related protein 3                                       |
|                                      | IRX4         | 2.513 | 2.795 | 1.651 | iroquois homeobox 4                                                                      |
| Cell differentiation, Neurogenesis   | C2orf82      | 2.513 | 2.103 | 1.995 | chromosome 2 open reading frame 82                                                       |
|                                      | DPYSL5       | 2.512 | 2.755 | 1.046 | dihydropyrimidinase-like 5                                                               |
|                                      | LYPD1        | 2.494 | 2.870 | 1.751 | LY6/PLAUR domain containing 1                                                            |
| Cell Proliferation                   | STC1         | 2.485 | 4.824 | 1.029 | stanniocalcin 1                                                                          |
| Immune response                      | LINC00637    | 2.466 | 2.579 | 2.171 | long intergenic non-protein coding RNA 637                                               |
|                                      | APLN         | 2.463 | 4.369 | 1.117 | apelin                                                                                   |
|                                      | LOC101929056 | 2.457 | 2.450 | 1.843 | uncharacterized LOC101929056                                                             |
| Cell migration                       | MEG8         | 2.447 | 3.255 | 1.438 | maternally expressed 8 (non-protein coding)                                              |
|                                      | CAMK2N1      | 2.428 | 3.450 | 1.080 | calcium/calmodulin-dependent protein kinase II inhibitor 1                               |
|                                      | LAMA5        | 2.424 | 3.755 | 1.365 | laminin, alpha 5                                                                         |
|                                      | CERS1        | 2.421 | 2.852 | 1.204 | ceramide synthase 1                                                                      |
| Cell cycle                           | FLJ32255     | 2.366 | 2.747 | 1.320 | uncharacterized LOC643977                                                                |
|                                      | SPRY1        | 2.316 | 5.727 | 0.653 | sprouty homolog 1, antagonist of FGF signaling (Drosophila)                              |
|                                      | SLC1A1       | 2.289 | 3.896 | 1.103 | solute carrier family 1 (neuronal/epithelial high affinity glutamate transporter, system |
| Cell differentiation, Neurogenesis   | DPYSL5       | 2.286 | 2.942 | 1.004 | dihydropyrimidinase-like 5                                                               |
|                                      | LOC284080    | 2.280 | 2.525 | 1.323 | uncharacterized LOC284080                                                                |
| Cell differentiation                 | DMKN         | 2.276 | 2.712 | 0.868 | dermokine                                                                                |
| Cell Proliferation                   | DUSP6        | 2.266 | 2.786 | 1.089 | dual specificity phosphatase 6                                                           |
| Cell Proliferation                   | BCL2         | 2.263 | 2.158 | 1.301 | B-cell CLL/lymphoma 2                                                                    |
|                                      | NT5E         | 2.262 | 2.801 | 1.421 | 5'-nucleotidase, ecto (CD73)                                                             |
|                                      | STEAP1       | 2.256 | 3.632 | 0.735 | six transmembrane epithelial antigen of the prostate 1                                   |
|                                      | LINC01433    | 2.252 | 2.944 | 1.489 | long intergenic non-protein coding RNA 1433                                              |
|                                      | DPF3         | 2.248 | 2.404 | 1.043 | D4, zinc and double PHD fingers, family 3                                                |
| Cell cycle                           | RRAGD        | 2.223 | 3.572 | 0.929 | Ras-related GTP binding D                                                                |
|                                      | BTBD11       | 2.223 | 3.522 | 0.726 | BTB (POZ) domain containing 11                                                           |
| Angiogenesis, Cell differentiation   | GPR4         | 2.193 | 3.423 | 1.136 | G protein-coupled receptor 4                                                             |
| Cell differentiation, Neurogenesis   | SLC12A7      | 2.182 | 2.346 | 1.181 | solute carrier family 12 (potassium/chloride transporter), member 7                      |
|                                      | LDLR         | 2.165 | 2.168 | 2.962 | low density lipoprotein receptor                                                         |
| Extracellular matrix                 | TGM2         | 2.159 | 2.107 | 1.121 | transglutaminase 2                                                                       |
|                                      | DUSP4        | 2.151 | 2.198 | 1.019 | dual specificity phosphatase 4                                                           |
|                                      | CELF2        | 2.149 | 2.351 | 0.265 | CUGBP, Elav-like family member 2                                                         |
| Immune response, Secretion           | PGF          | 2.146 | 3.154 | 0.979 | placental growth factor                                                                  |
|                                      | TLR4         | 2.145 | 2.357 | 0.823 | toll-like receptor 4                                                                     |
| Cell cycle, Cell death, Neurogenesis | BRSK2        | 2.129 | 2.655 | 1.006 | BR serine/threonine kinase 2                                                             |

|                                                       |           |       |       |       |                                                          |
|-------------------------------------------------------|-----------|-------|-------|-------|----------------------------------------------------------|
|                                                       | KANK3     | 2.126 | 2.190 | 1.012 | KN motif and ankyrin repeat domains 3                    |
| Cell migration                                        | EPHB3     | 2.123 | 2.429 | 0.645 | EPH receptor B3                                          |
|                                                       | NALCN     | 2.109 | 2.372 | 1.328 | sodium leak channel, non selective                       |
|                                                       | ST3GAL6   | 2.096 | 2.975 | 1.301 | ST3 beta-galactoside alpha-2,3-sialyltransferase 6       |
|                                                       | ANO7      | 2.086 | 2.211 | 2.191 | anoctamin 7                                              |
|                                                       | THSD4     | 2.074 | 2.322 | 1.255 | thrombospondin, type I, domain containing 4              |
|                                                       | EPHA1-AS1 | 2.074 | 3.433 | 0.791 | EPHA1 antisense RNA 1                                    |
| Apoptotic process, Immune response                    | LY96      | 2.067 | 2.328 | 0.757 | lymphocyte antigen 96                                    |
| Cell differentiation, Neurogenesis                    | NDRG1     | 2.059 | 4.576 | 0.958 | N-myc downstream regulated 1                             |
| Cell Proliferation                                    | HMGA2     | 2.058 | 2.522 | 0.694 | high mobility group AT-hook 2                            |
|                                                       | ARHGEF4   | 2.047 | 3.437 | 0.968 | Rho guanine nucleotide exchange factor (GEF) 4           |
| Cell Proliferation, Cell migration, Apoptotic process | DDIT4     | 2.044 | 4.488 | 1.357 | DNA-damage-inducible transcript 4                        |
|                                                       | LINC01291 | 2.042 | 2.981 | 0.807 | long intergenic non-protein coding RNA 1291              |
|                                                       | SETD3     | 2.041 | 2.043 | 1.495 | SET domain containing 3                                  |
|                                                       | PRRT1     | 2.037 | 2.139 | 1.700 | proline-rich transmembrane protein 1                     |
|                                                       | TMEM74B   | 2.031 | 3.929 | 0.781 | transmembrane protein 74B                                |
|                                                       | ITGB8     | 2.023 | 2.619 | 1.560 | integrin, beta 8                                         |
|                                                       | SFRP1     | 2.020 | 3.473 | 1.631 | secreted frizzled-related protein 1                      |
| Cell differentiation                                  | SULF2     | 2.014 | 2.460 | 0.685 | sulfatase 2                                              |
| Cell cycle                                            | RASSF2    | 2.012 | 3.251 | 0.915 | Ras association (RalGDS/AF-6) domain family member 2     |
| Cell cycle                                            | INHBA     | 0.500 | 0.493 | 0.821 | inhibin, beta A                                          |
|                                                       | ARSG      | 0.499 | 0.478 | 0.578 | arylsulfatase G                                          |
|                                                       | LOC392364 | 0.493 | 0.320 | 0.373 | nuclear pore associated protein 1 pseudogene             |
|                                                       | PRDM15    | 0.492 | 0.396 | 0.429 | PR domain containing 15                                  |
|                                                       | ARMCX4    | 0.490 | 0.315 | 0.234 | armadillo repeat containing, X-linked 4                  |
|                                                       | SAMD11    | 0.484 | 0.487 | 1.013 | sterile alpha motif domain containing 11                 |
|                                                       | LINC01124 | 0.471 |       |       | long intergenic non-protein coding RNA 1124              |
| Apoptotic process                                     | TRIM39    | 0.471 | 0.464 | 0.473 | tripartite motif containing 39                           |
|                                                       | SEPP1     | 0.470 | 0.304 | 0.226 | selenoprotein P, plasma, 1                               |
|                                                       | DIO2      | 0.464 | 0.296 | 1.080 | deiodinase, iodothyronine, type II                       |
|                                                       | PLEKHA7   | 0.461 | 0.430 | 0.827 | pleckstrin homology domain containing, family A member 7 |
| Apoptotic process                                     | PRUNE2    | 0.460 | 0.477 | 1.691 | prune homolog 2 (Drosophila)                             |
|                                                       | HCK       | 0.459 | 0.237 | 0.554 | HCK proto-oncogene, Src family tyrosine kinase           |
|                                                       | TBC1D22A  | 0.459 | 0.288 | 0.385 | TBC1 domain family, member 22A                           |
|                                                       | KRT16P2   | 0.453 | 0.348 | 0.640 | keratin 16 pseudogene 2                                  |
|                                                       | C10orf120 | 0.447 | 0.497 | 0.362 | chromosome 10 open reading frame 120                     |
|                                                       | ZCCHC6    | 0.443 | 0.317 | 0.526 | zinc finger, CCHC domain containing 6                    |
|                                                       | GGTLC2    | 0.441 | 0.492 | 0.482 | gamma-glutamyltransferase light chain 2                  |
| Cell migration                                        | GREM1     | 0.441 | 0.434 | 0.687 | gremlin 1, DAN family BMP antagonist                     |
| Cell differentiation                                  | SOX3      | 0.439 | 0.492 | 0.299 | SRY (sex determining region Y)-box 3                     |
|                                                       | LOC284950 | 0.436 | 0.298 | 1.146 | uncharacterized LOC284950                                |
|                                                       | STEAP4    | 0.427 | 0.162 | 0.202 | STEAP family member 4                                    |
|                                                       | PTGFR     | 0.424 | 0.486 | 0.982 | prostaglandin F receptor (FP)                            |
|                                                       | ZNF236    | 0.419 | 0.471 | 0.566 | zinc finger protein 236                                  |

|                                  |              |       |       |       |                                                                    |
|----------------------------------|--------------|-------|-------|-------|--------------------------------------------------------------------|
|                                  | GGTLC1       | 0.418 | 0.465 | 0.417 | gamma-glutamyltransferase light chain 1                            |
|                                  | ITFG3        | 0.415 | 0.405 | 0.379 | integrin alpha FG-GAP repeat containing 3                          |
| Extracellular matrix             | RARRES2      | 0.409 | 0.444 | 1.087 | retinoic acid receptor responder (tazarotene induced) 2            |
| Cell Proliferation               | PDZK1        | 0.401 | 0.437 | 0.942 | PDZ domain containing 1                                            |
| Cell Proliferation               | PRDM1        | 0.399 | 0.463 | 1.151 | PR domain containing 1, with ZNF domain                            |
| Extracellular matrix             | ADAMTS1      | 0.399 | 0.370 | 0.797 | ADAM metalloproteinase with thrombospondin type 1 motif, 1         |
| Extracellular matrix             | EDIL3        | 0.391 | 0.400 | 0.846 | EGF-like repeats and discoidin I-like domains 3                    |
|                                  | LOC400743    | 0.389 | 0.498 | 0.266 | uncharacterized LOC400743                                          |
| Cell cycle                       | ZBTB49       | 0.389 | 0.292 | 0.372 | zinc finger and BTB domain containing 49                           |
|                                  | PTGFR        | 0.384 | 0.481 | 0.936 | prostaglandin F receptor (FP)                                      |
|                                  | POU6F1       | 0.382 | 0.489 | 0.523 | POU class 6 homeobox 1                                             |
| Extracellular matrix             | AEBP1        | 0.381 | 0.438 | 0.741 | AE binding protein 1                                               |
| Cell Proliferation               | NR4A3        | 0.378 | 0.352 | 0.962 | nuclear receptor subfamily 4, group A, member 3                    |
| Cell migration                   | GREM1        | 0.376 | 0.386 | 0.757 | gremlin 1, DAN family BMP antagonist                               |
| Cell migration                   | AMOT         | 0.372 | 0.461 | 0.234 | angiomin                                                           |
| Cell migration                   | CYP1B1       | 0.370 | 0.471 | 1.034 | cytochrome P450, family 1, subfamily B, polypeptide 1              |
|                                  | lnc-STOM-2   | 0.367 | 0.328 | 0.255 | lnc-STOM-2:2                                                       |
|                                  | TMEM140      | 0.362 | 0.484 | 0.459 | transmembrane protein 140                                          |
|                                  | NOSTRIN      | 0.361 | 0.447 | 0.770 | nitric oxide synthase trafficking                                  |
| Angiogenesis                     | ACKR3        | 0.360 | 0.473 | 0.782 | atypical chemokine receptor 3                                      |
| Cell Proliferation               | ATOH8        | 0.359 | 0.400 | 1.052 | atonal homolog 8 (Drosophila)                                      |
| Inflammatory response            | NCR3         | 0.356 | 0.452 | 0.476 | natural cytotoxicity triggering receptor 3                         |
| Cell cycle                       | FGF9         | 0.353 | 0.295 | 0.267 | fibroblast growth factor 9                                         |
|                                  | PROC         | 0.352 | 0.442 | 0.423 | protein C (inactivator of coagulation factors Va and VIIIa)        |
|                                  | lnc-CLIC6-1  | 0.350 | 0.420 | 0.398 | lnc-CLIC6-1:1                                                      |
| Cell migration                   | CCL7         | 0.349 | 0.386 | 0.262 | chemokine (C-C motif) ligand 7                                     |
|                                  | KRT42P       | 0.346 | 0.329 | 0.585 | keratin 42 pseudogene                                              |
| Aging                            | KRT14        | 0.343 | 0.358 | 0.604 | keratin 14, type I                                                 |
|                                  | FAXC         | 0.342 | 0.449 | 0.377 | failed axon connections homolog (Drosophila)                       |
|                                  | MSL3         | 0.340 | 0.377 | 0.500 | male-specific lethal 3 homolog (Drosophila)                        |
|                                  | LOC400553    | 0.339 |       | 0.135 | uncharacterized LOC400553                                          |
| Cell differentiation, Cell death | KRT17        | 0.332 | 0.365 | 0.647 | keratin 17, type I                                                 |
|                                  | C7orf69      | 0.331 | 0.268 | 0.842 | chromosome 7 open reading frame 69                                 |
| Cell differentiation             | TRPC4        | 0.329 | 0.370 | 1.011 | transient receptor potential cation channel, subfamily C, member 4 |
| Secretion                        | CPLX2        | 0.327 | 0.458 | 0.389 | complexin 2                                                        |
|                                  | NIPAL4       | 0.327 | 0.466 | 0.246 | NIPA-like domain containing 4                                      |
|                                  | CRYM         | 0.326 | 0.247 | 0.368 | crystallin, mu                                                     |
| Cell migration                   | NRG2         | 0.325 | 0.496 | 0.427 | neuregulin 2                                                       |
|                                  | TPH2         | 0.322 | 0.214 | 0.172 | tryptophan hydroxylase 2                                           |
|                                  | LOC100268168 | 0.319 | 0.384 | 0.391 | uncharacterized LOC100268168                                       |
|                                  | LOC100129027 | 0.319 | 0.214 | 0.324 | uncharacterized LOC100129027                                       |
| Extracellular matrix             | ADAMTS1      | 0.314 | 0.303 | 0.861 | ADAM metalloproteinase with thrombospondin type 1 motif, 1         |
|                                  | FAR2         | 0.304 | 0.476 | 0.793 | fatty acyl CoA reductase 2                                         |
| Cell migration                   | PDE4D        | 0.304 | 0.378 | 0.190 | phosphodiesterase 4D, cAMP-specific                                |

|                                    |             |       |       |       |                                                                    |
|------------------------------------|-------------|-------|-------|-------|--------------------------------------------------------------------|
|                                    | RDH16       | 0.295 | 0.269 | 0.274 | retinol dehydrogenase 16 (all-trans)                               |
| Cell differentiation               | LIPN        | 0.295 | 0.282 | 0.235 | lipase, family member N                                            |
|                                    | B3GALT4     | 0.294 | 0.411 | 1.203 | UDP-Gal:betaGlcNAc beta 1,3-galactosyltransferase, polypeptide 4   |
| Cell migration                     | S100A1      | 0.291 | 0.282 | 0.276 | S100 calcium binding protein A1                                    |
|                                    | MUC5AC      | 0.289 | 0.189 | 0.245 | mucin 5AC, oligomeric mucus/gel-forming                            |
| Immune response                    | C4BPB       | 0.288 | 0.207 | 0.612 | complement component 4 binding protein, beta                       |
|                                    | FAM230B     | 0.283 | 0.331 | 0.173 | family with sequence similarity 230, member B (non-protein coding) |
|                                    | AMPH        | 0.278 | 0.374 | 0.846 | amphiphysin                                                        |
| Cell differentiation               | EGR2        | 0.277 | 0.321 | 0.733 | early growth response 2                                            |
|                                    | TMPRSS15    | 0.276 | 0.287 | 0.271 | transmembrane protease, serine 15                                  |
|                                    | TRABD2B     | 0.274 | 0.454 | 0.576 | TraB domain containing 2B                                          |
| Cell differentiation, Neurogenesis | GPR37L1     | 0.265 | 0.469 | 0.781 | G protein-coupled receptor 37 like 1                               |
|                                    | ECEL1P2     | 0.263 | 0.264 | 0.746 | endothelin converting enzyme-like 1, pseudogene 2                  |
| Cell migration                     | NRP2        | 0.260 | 0.323 | 0.446 | neuropilin 2                                                       |
|                                    | MSC         | 0.258 | 0.414 | 0.815 | musculin                                                           |
|                                    | SPG20-AS1   | 0.253 | 0.315 | 0.464 | SPG20 antisense RNA 1                                              |
| Cell Proliferation                 | IGFN1       | 0.246 | 0.236 | 0.705 | immunoglobulin-like and fibronectin type III domain containing 1   |
|                                    | CAMK1G      | 0.243 |       | 0.225 | calcium/calmodulin-dependent protein kinase IG                     |
| Cell cycle                         | PAX6        | 0.236 | 0.381 | 1.077 | paired box 6                                                       |
| Cell migration                     | OLR1        | 0.233 | 0.227 | 1.032 | oxidized low density lipoprotein (lectin-like) receptor 1          |
| Extracellular matrix               | ABI3BP      | 0.231 | 0.219 | 0.864 | ABI family, member 3 (NESH) binding protein                        |
|                                    | OR10J5      | 0.226 | 0.165 | 0.150 | olfactory receptor, family 10, subfamily J, member 5               |
|                                    | lnc-ENPP1-2 | 0.223 | 0.276 | 0.208 | lnc-ENPP1-2:1                                                      |
|                                    | CMA1        | 0.220 |       |       | chymase 1, mast cell                                               |
| Cell migration                     | NRP2        | 0.217 | 0.340 | 0.398 | neuropilin 2                                                       |
|                                    | EPDR1       | 0.216 | 0.325 | 0.358 | ependymin related 1                                                |
|                                    | CNN1        | 0.213 | 0.251 | 0.267 | calponin 1, basic, smooth muscle                                   |
| Cell migration                     | SAA2        | 0.201 | 0.405 | 1.237 | serum amyloid A2                                                   |
| Cell migration                     | SAA4        | 0.200 | 0.426 | 1.362 | serum amyloid A4, constitutive                                     |
|                                    | CPE         | 0.198 | 0.247 | 0.182 | carboxypeptidase E                                                 |
| Cell migration                     | EDN2        | 0.195 | 0.289 | 0.512 | endothelin 2                                                       |
| Immune response                    | ENPP2       | 0.195 | 0.334 | 0.370 | ectonucleotide pyrophosphatase/phosphodiesterase 2                 |
| Extracellular matrix               | ABI3BP      | 0.193 | 0.219 | 0.939 | ABI family, member 3 (NESH) binding protein                        |
| Cell cycle                         | PAX6        | 0.188 | 0.379 | 1.321 | paired box 6                                                       |
|                                    | PCDHB5      | 0.184 | 0.384 | 0.197 | protocadherin beta 5                                               |
| Cell Proliferation                 | DUSP2       | 0.179 | 0.156 | 0.655 | dual specificity phosphatase 2                                     |
| Neurogenesis                       | NPTX1       | 0.178 | 0.203 |       | neuronal pentraxin I                                               |
| Extracellular matrix               | COL5A2      | 0.158 | 0.204 | 0.171 | collagen, type V, alpha 2                                          |
|                                    | MAP3K14-AS1 | 0.154 | 0.208 | 0.189 | MAP3K14 antisense RNA 1                                            |
|                                    | CACNA1G-AS1 | 0.153 | 0.259 | 1.211 | CACNA1G antisense RNA 1                                            |
|                                    | MAN1A1      |       | 0.140 | 0.452 | mannosidase, alpha, class 1A, member 1                             |
|                                    | KANK4       |       |       | 0.941 | KN motif and ankyrin repeat domains 4                              |
